# Supplementary material for: MOXD1 is a lineage-specific gene and a tumor suppressor in neuroblastoma
Source: PubMed Central journal article supplement (PMC11192077; doi:10.1126/sciadv.ado1583), 2024-06-21
Supplement: sciadv.ado1583_sm.pdf [file sciadv.ado1583_sm.pdf]

Supplementary Materials for  
***MOXD1* is a lineage-specific gene and a tumor suppressor in neuroblastoma**

Elina Fredlund *et al.*

Corresponding author: Sofie Mohlin, [sofie.mohlin@med.lu.se](mailto:sofie.mohlin@med.lu.se)

*Sci. Adv.* **10**, eado1583 (2024)  
DOI: 10.1126/sciadv.ado1583

**This PDF file includes:**

Figs. S1 to S5  
Tables S1 and S2

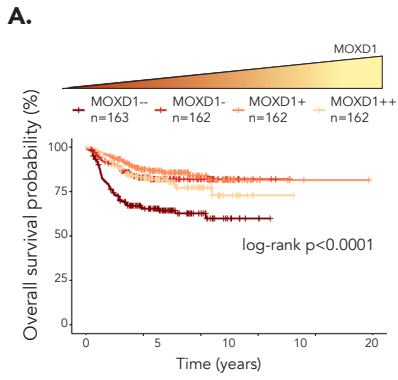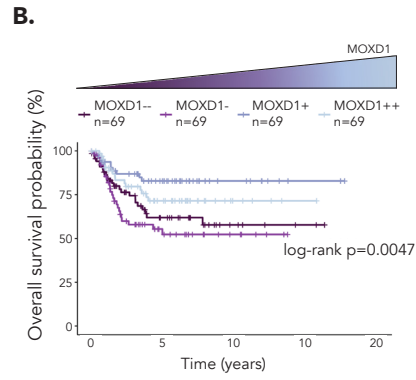

**C.**

|                     | Overall survival |              |        |
|---------------------|------------------|--------------|--------|
|                     | Hazard ratio     | 95% CI       | $p$    |
| >18mo               | 7.46             | 4.54 - 12.25 | <0.001 |
| MOXD1--             | 2.19             | 1.48 - 3.24  | <0.001 |
| Stage 4             | 7.62             | 4.76 - 12.19 | <0.001 |
| MOXD1--             | 2.33             | 1.58 - 3.45  | <0.001 |
| MYCN <sup>amp</sup> | 6.25             | 4.13 - 9.45  | <0.001 |
| MOXD1--             | 2.00             | 1.33 - 3.01  | <0.001 |

**D.**

|                     | Overall survival |              |        |
|---------------------|------------------|--------------|--------|
|                     | Hazard ratio     | 95% CI       | $p$    |
| >18mo               | 9.27             | 5.99 - 14.34 | <0.001 |
| MOXD1--             | 1.81             | 1.28 - 2.54  | <0.001 |
| Stage 4             | 7.95             | 5.34 - 11.83 | <0.001 |
| MOXD1--             | 1.89             | 1.35 - 2.66  | <0.001 |
| MYCN <sup>amp</sup> | 6.57             | 4.58 - 9.42  | <0.001 |
| MOXD1--             | 1.59             | 1.11 - 2.27  | 0.011  |

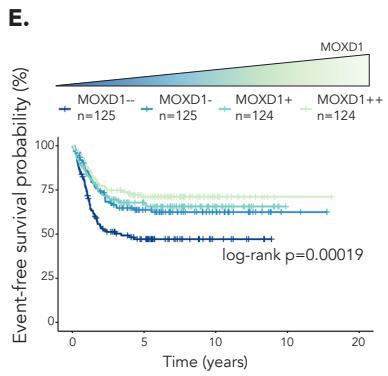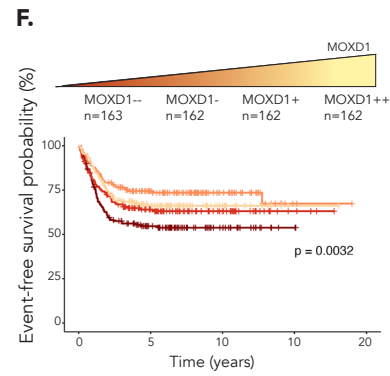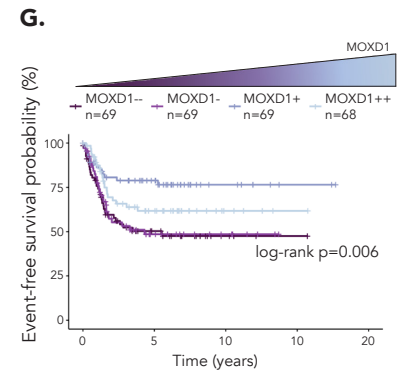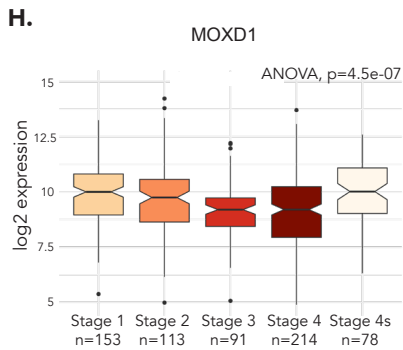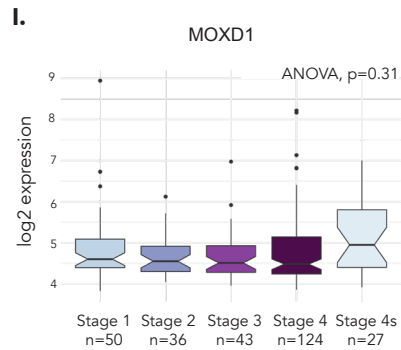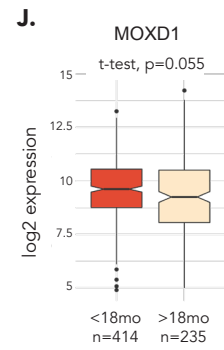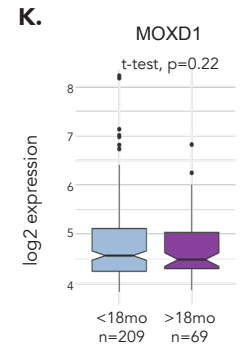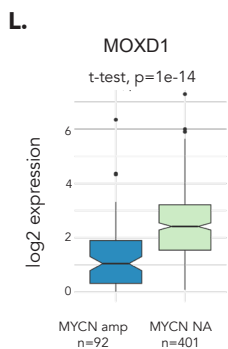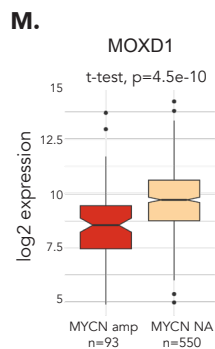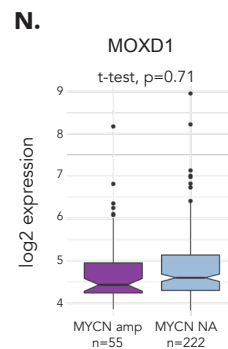

**Fig. S1. Low expression of *MOXDI* correlates with poor outcome in neuroblastoma. (A–B)** Kaplan-Meier overall survival curves with log-rank p-value for neuroblastoma patients in (A) the Kocak cohort ( $n=649$ ) and (B) the NRC cohort ( $n=276$ ). Patients are stratified into four groups (quartiles) based on *MOXDI* mRNA expression. **(C–D)** Prognostic effect of *MOXDI* mRNA expression for neuroblastoma patients in the (C) SEQC cohort and (D) Kocak cohort, comparing 1<sup>st</sup> vs 2<sup>nd</sup>, 3<sup>rd</sup> and 4<sup>th</sup> quartile of *MOXDI* expression with adjustment for age at diagnosis, INSS stage of disease and *MYCN* amplification status, respectively. Hazard ratios, 95% confidence intervals (CI) and log-rank p-values are given by multivariate Cox regression analyses. **(E–G)** Kaplan-Meier plot of event-free survival of neuroblastoma patients stratified according to quartiles of *MOXDI* expression from (E) SEQC cohort ( $n=498$ ), (F) Kocak cohort ( $n=649$ ), and (G) NRC cohort ( $n=276$ ). Number of patients ( $n$ ) is specified for each subgroup. p-value by log-rank test as indicated. **(H–I)** *MOXDI* expression across the INSS stages in neuroblastoma patients from (H) Kocak cohort and (I) NRC cohort. Number of patients ( $n$ ) is specified for each stage and p-value by ANOVA test as indicated. **(J–K)** *MOXDI* expression in neuroblastoma patients stratified according to age at diagnosis (<18 months vs >18 months) from (J) Kocak cohort and (K) NRC cohort. Number of patients ( $n$ ) is specified for each age group and p-value by t-test as indicated. **(L–N)** *MOXDI* expression in neuroblastoma patients stratified according to *MYCN* status; *MYCN* amplified (amp) vs *MYCN* non amplified (NA) from (L) SEQC cohort, (M) Kocak cohort, and (N) NRC cohort. Number of patients ( $n$ ) is specified for each group and p-value by t-test as indicated.

**A.**

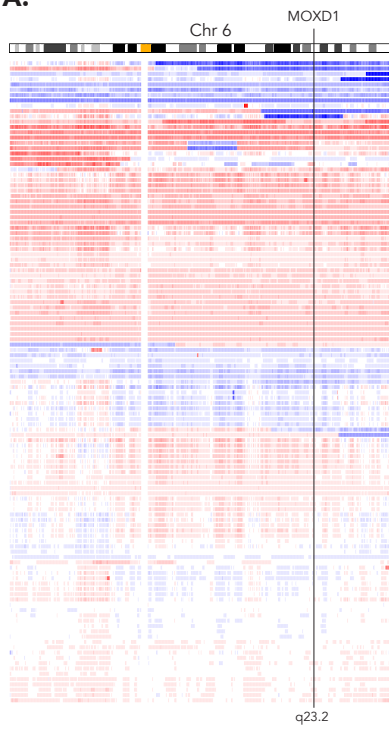

**B.**

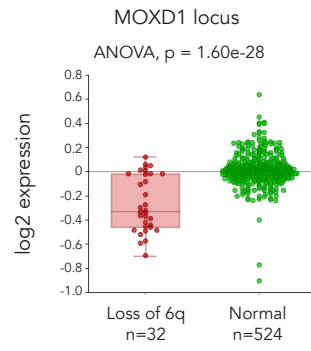

**Fig. S2. *MOXD1* locus is lost in high-risk neuroblastoma. (A)** DNA copy-number aberrations on chromosome 6 from 87 neuroblastomas of all stages. The location of *MOXD1* on 6q23.2 is marked by the line. Gains, red; losses, blue. Each row represents an individual patient. **(B)** Expression of genes in the surrounding *MOXD1* locus (*ARG1*, *CTGF*, *ENPP1*, *ENPP3*, *STX7*, *MED23*, *MOXD1*, *OR2A4*, and *CTAGE9*) in patients with a normal 6q karyotype as compared to patients with loss of 6q (as defined in, and data from Depuydt *et al.* (8)). Number of patients (*n*) is specified for each group and p-value by ANOVA as indicated.

**A.**

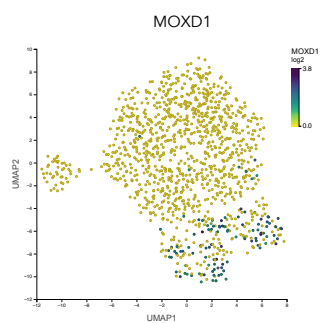

**B.**  
MES markers

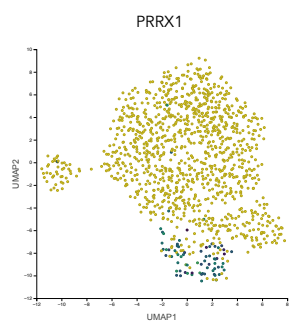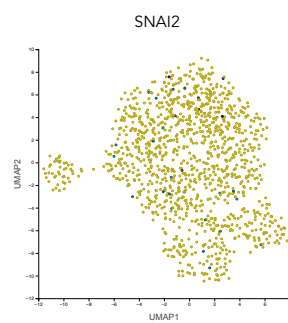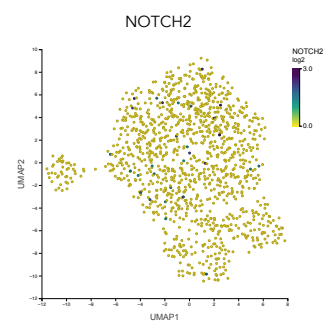

**C.**  
ADRN markers

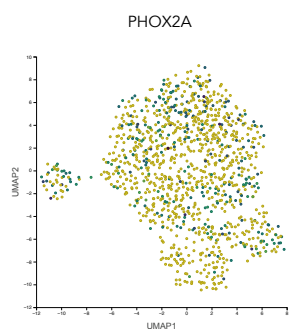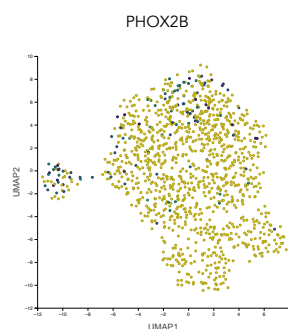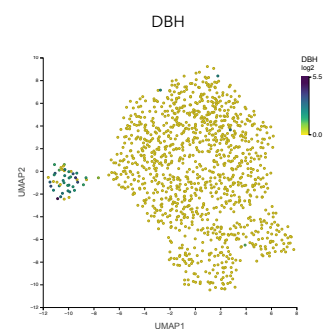

**Fig. S3. SK-N-SH cells express *MOXD1* and MES- and ADRN markers.** (A–C) UMAP plots from single cell analysis of the heterogeneous neuroblastoma cell line SK-N-SH (data from Gartlgruber *et al.* (15)). Color scale shows log2 transformed expression. **(A)** Visualization of *MOXD1* expression. **(B)** Visualization of MES markers (*PRRX1*, *SNAI2*, and *NOTCH2*). **(C)** Visualization of ADRN markers (*PHOX2A*, *PHOX2B*, and *DBH*).

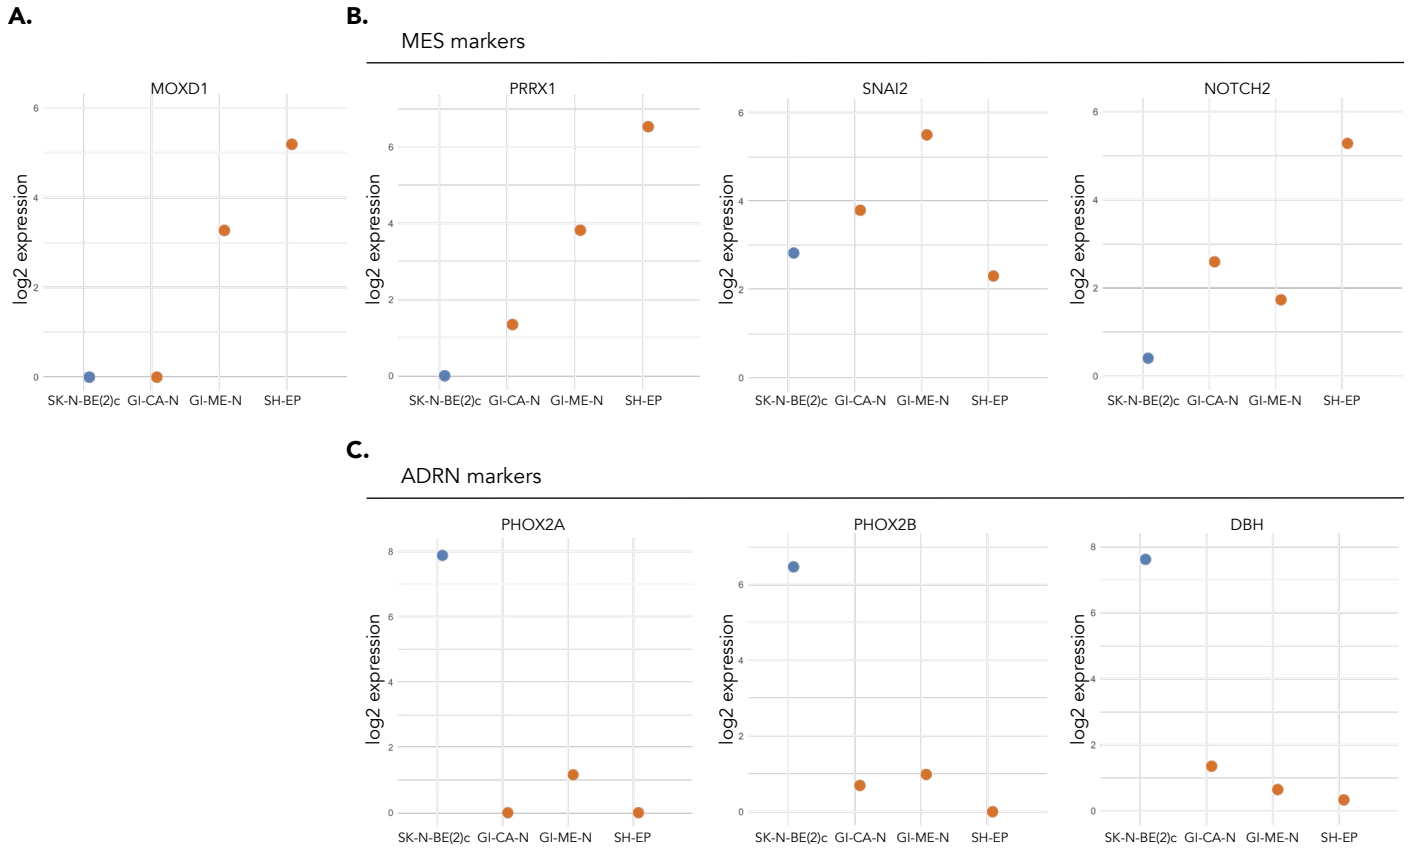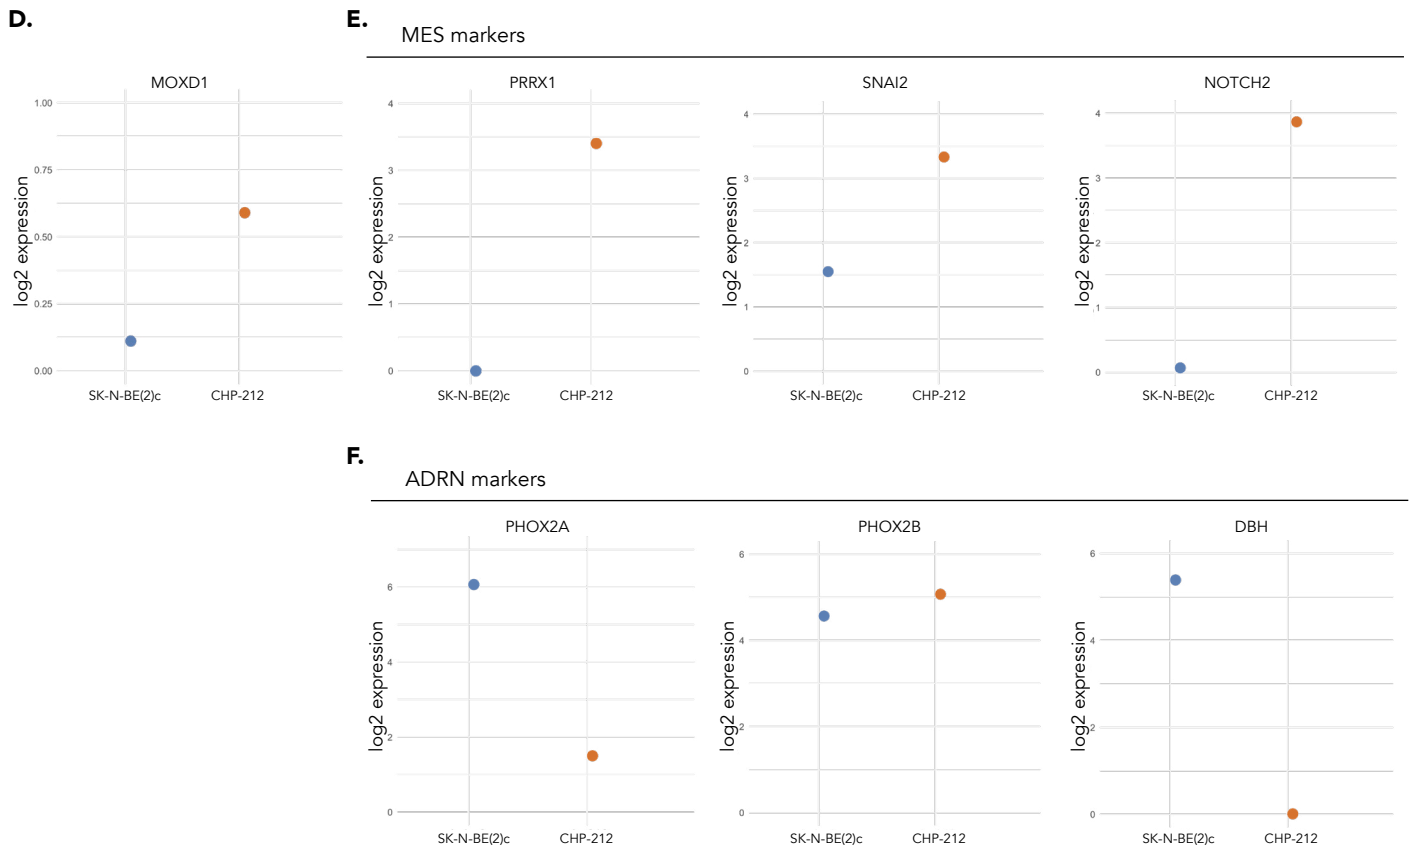



**Fig. S4. *MOXD1* expression is increased in MES-like neuroblastoma cell lines. (A–C)** Expression of *MOXD1* (A), MES markers (*PRRX1*, *SNAI2* and *NOTCH2*, (B)), and ADRN markers (*PHOX2A*, *PHOX2B*, and *DBH*, (C)) in SK-N-BE(2)c (ADRN-like cells) and in GI-CA-N, GI-ME-N and SH-EP (MES-like cells). RNAseq data from Boeva *et al.*, 2017 (11). **(D–F)** Expression of *MOXD1* (D), MES markers (*PRRX1*, *SNAI2* and *NOTCH2*, (E)), and ADRN markers (*PHOX2A*, *PHOX2B*, and *DBH*, (F)) in SK-N-BE(2)c (ADRN-like cells) and in CHP-212 (MES-like cells). RNAseq data from Harenza *et al.*, 2017 (40).

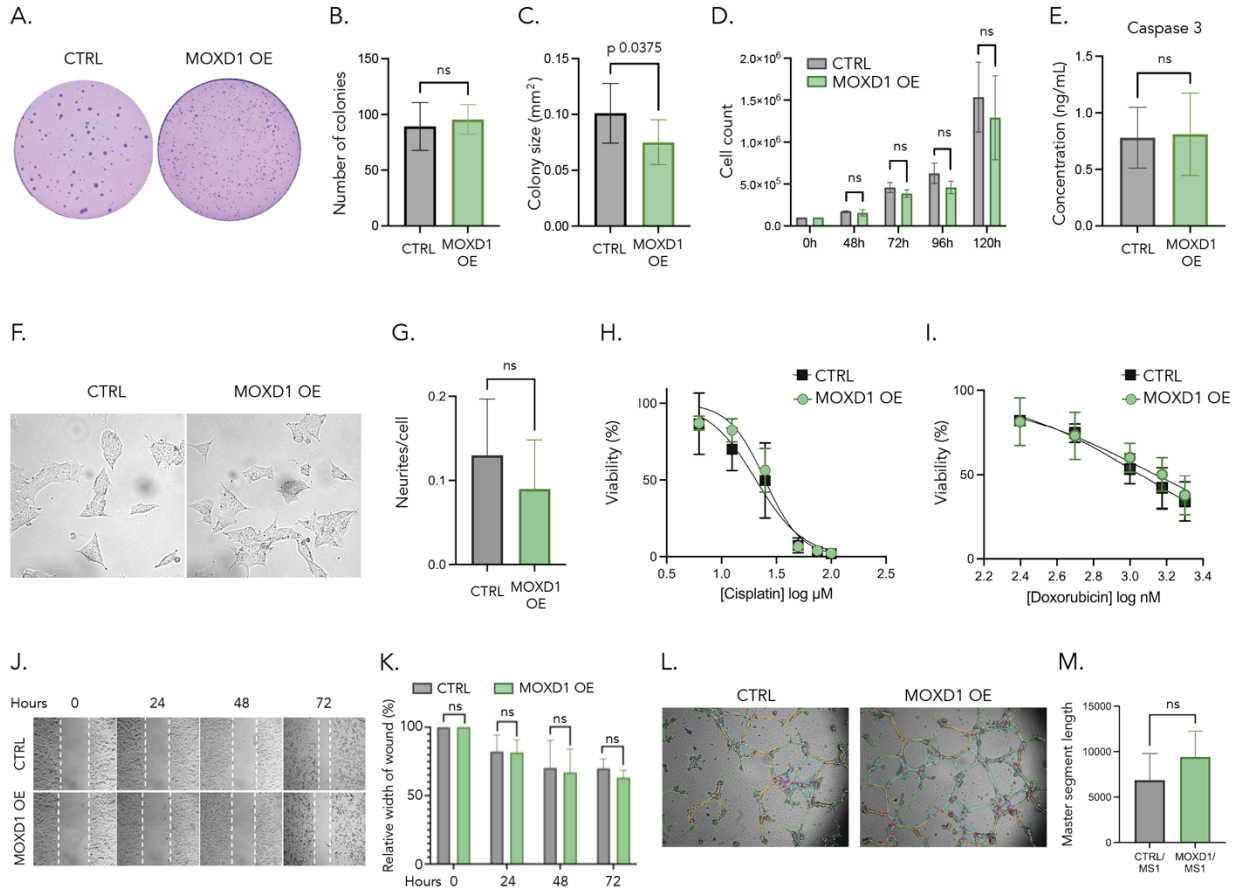

**Fig. S5. Overexpression of *MOXD1* does not affect neuroblastoma cell differentiation or drug response *in vitro*.** (A) Representative images from colony formation assay of control (CTRL) and *MOXD1* overexpressing (OE) SK-N-BE(2)c cells. (B–C) Number (B) and size (C) of colonies formed by SK-N-BE(2)c CTRL and *MOXD1* OE cells ( $n=3$  biologically independent repeats for each group). Values are presented as mean and bars indicate standard deviation. p-value by unpaired t-test as indicated. ns,  $p > 0.05$ . (D) Proliferative capacity of SK-N-BE(2)c CTRL and *MOXD1* OE cells measured by cell count at indicated time points. Values are presented as mean ( $n = 3$  biologically independent repeats for each group) and bars indicate standard deviation. p-value by two-way ANOVA as indicated. ns,  $p > 0.05$ . (E) Detection of caspase 3 activity as determined by ELISA assay in SK-N-BE(2)c CTRL and *MOXD1* OE cells. Concentrations are presented as mean ( $n = 3$  biologically independent repeats for each group and time point) and bars indicate standard deviation. ns,  $p > 0.05$ . (F) Representative brightfield images of SK-N-BE(2)c CTRL and *MOXD1* OE cells 24 hours post seeding, quantification in (G). (G) Blinded quantification of neurite outgrowth per cell. Values are reported as mean ( $n = 4$  biologically independent repeats for each group), bars represent standard deviation. ns,  $p > 0.05$ . (H–I) Dose-response curves of indicated concentrations of cisplatin and doxorubicin in SK-N-BE(2) CTRL and *MOXD1* OE cells. Cell viability was determined by CellTiter-Glo 48 hours post-treatment. Values are reported as mean  $\pm$  SEM, ( $n = 3$  biologically independent repeats for each group). No measured point reached  $p < 0.05$ . (J) Wound healing assay of confluent SK-N-BE(2)c CTRL and *MOXD1* OE cells. Representative phase contrast images were captured at indicated time points. (K) Width of the wound is presented as percentage at each analyzed time point. Bars indicate standard deviation,  $n = 4$  biologically independent repeats for each group. Statistical analysis was performed with two-way ANOVA. ns,  $p > 0.05$ . (L) Representative phase contrast images of SK-N-BE(2)c cells co-cultured with MS1 cells for 8 hours. Color overlay by ImageJ Angiogenesis Analyzer plug-in. (M) Images were analyzed for cellular networks using the ImageJ Angiogenesis Analyzer plug-in. Quantification of master segment length, values are presented as mean and bars indicate standard deviation ( $n = 2$  biologically independent repeats for each group). Statistical analysis was performed with unpaired t-test. ns,  $p > 0.05$ .

| <b>IF antibodies</b>        |                |                 |               |                  |
|-----------------------------|----------------|-----------------|---------------|------------------|
| <b>Primary Antibody</b>     | <b>Species</b> | <b>Dilution</b> | <b>Source</b> | <b>Product #</b> |
| MOXD1 (human)               | Rabbit         | 1:1000          | Thermo Fisher | PA5-31526        |
| MOXD1 (zebrafish)           | Rabbit         | 1:200           | Aviva         | ARP62346_P050    |
|                             |                |                 |               |                  |
| <b>Secondary Antibody</b>   | <b>Species</b> | <b>Dilution</b> | <b>Source</b> | <b>Product #</b> |
| Anti-Rabbit Alexa Fluor-546 | Donkey         | 1:1000 / 1:500  | Thermo Fisher | A-10040          |
| Anti-Rabbit Alexa Fluor-647 | Donkey         | 1:1000          | Thermo Fisher | A31573           |

| <b>IHC antibodies</b>                            |                |                 |               |                  |
|--------------------------------------------------|----------------|-----------------|---------------|------------------|
| <b>Primary Antibody</b>                          | <b>Species</b> | <b>Dilution</b> | <b>Source</b> | <b>Product #</b> |
| MOXD1 (TMA)                                      | Rabbit         | 1:1000          | Thermo Fisher | PA5-31526        |
| phospho-Histone H3 (Ser10)                       | Rabbit         | 1:200           | Sigma-Aldrich | 06-570           |
|                                                  |                |                 |               |                  |
| <b>Secondary Antibody</b>                        | <b>Species</b> | <b>Dilution</b> | <b>Source</b> | <b>Product #</b> |
| anti-rabbit IgG (whole molecule)-Biotin antibody | Goat           | 1:200           | Sigma-Aldrich | B-7389           |

| <b>Nuclear staining</b> |                |                 |               |                  |
|-------------------------|----------------|-----------------|---------------|------------------|
|                         | <b>Species</b> | <b>Dilution</b> | <b>Source</b> | <b>Product #</b> |
| DAPI                    |                | 1:3000          | Dako          | D3571            |

**Table S1.** List of antibodies.

| Target gene                   | 5' - 3' |                           |
|-------------------------------|---------|---------------------------|
| <i>UBC (Reference gene)</i>   | Fwd     | ATTTGGGTCGCGGTTCTTG       |
|                               | Rev     | TGCCTTGACATTCTCGATGGT     |
| <i>SDHA (Reference gene)</i>  | Fwd     | TGGAACAAGAGGGCATCTG       |
|                               | Rev     | CCACCACTGCATCAAATTCATG    |
| <i>YWHAZ (Reference gene)</i> | Fwd     | ACTTTTGGTACATTGTGGCTTCAA  |
|                               | Rev     | CCGCCAGGACAAACCAGTAT      |
| DBH                           | Fwd     | GCTCTCATGGAATGTCAGCTACA   |
|                               | Rev     | ACAGGACGCCAGCCTTGA        |
| MOXD1                         | Fwd     | TGAGATGTTCCAAGACAGACAA    |
|                               | Rev     | TGCCACACACCAAAGGTTT       |
| NOTCH1                        | Fwd     | CCGCAGTTGTGCTCCTGAA       |
|                               | Rev     | ACCTTGGCGGTCTCGTAGCT      |
| PHOX2A                        | Fwd     | GATGGACTACTCCTACCTCAATTCG |
|                               | Rev     | GCTGCAGGCGCCAAAGT         |
| PHOX2B                        | Fwd     | CAGGGACCACCAGAGCAGT       |
|                               | Rev     | CTGCTTGCGCTTCTCGTTGA      |
| PRRX1                         | Fwd     | CAGAACCGAAGAGCCAAGT       |
|                               | Rev     | GAGTAGGATTTGAGGAGGGAAG    |
| SNAI2                         | Fwd     | ATGTCGGTTGTCTGGTTG        |
|                               | Rev     | TCTCCTGTGTTTTGTTCTTG      |

**Table S2.** List of primers for qPCR.
